# Supplementary material
Source: PubMed Central journal article supplement (PMC5614601)
Supplement: NIHMS827179-supplement-1.pdf [file NIHMS827179-supplement-1.pdf]

| <b>Object Title</b>                                                                             | <b>Page #</b> |
|-------------------------------------------------------------------------------------------------|---------------|
| Supplementary Figure 1: Electropherogram .....                                                  | 2             |
| Supplementary Figure 2: Ramachandran plot .....                                                 | 3             |
| Supplementary Figure 3: Modeling <i>ERCC3</i> R109X via CRISPR/Cas9 genome editing. ....        | 4             |
| Supplementary Figure 4: Haplotype analyses from the TAGC heterozygote carriers .....            | 5             |
| Supplementary Figure 5: <i>ERCC3</i> mutations present in the cBioPortal (MSKCC) datasets. .... | 6             |
| Supplementary Figure 6: <i>ERCC3</i> transcript levels in patient derived whole blood. ....     | 7             |
| Supplementary Table 1: Family history and pathology information on R109X carriers .....         | 8             |
| Supplementary Table 2: Identity of mutations in HMLE cell lines generated by CRISPR/Cas9. ...   | 9             |

Supplementary Figure 1: Electropherogram showing heterozygous nonsense mutation c.325C>T in 3 siblings affected with breast cancer from the kindred shown in Figure 1.

Supplementary Figure 2: Ramachandran plot of the first 300 amino acids of ERCC3 shows the Arg109 residue within the left lower quadrant corresponding to the right handed alpha-helix as predicted by the *ab-initio* modeling server EVfold. Lack of high resolution template structure limits any further modeling of this domain.

Supplementary Figure 3: Modeling *ERCC3* R109X via CRISPR/Cas9 genome editing. Sanger sequencing performed on genomic DNA extracted from CRISPR/Cas9 edited HMLE cell lines harboring frameshift or point mutation at the *ERCC3* R109 locus. The star indicates the nucleotide position c.325C within the chromatogram. The arrow indicates the position at which the CRISPR/Cas9 mediated change occurs.

Supplementary Figure 4: Haplotype analyses from the TAGC heterozygote carriers. Carriers of the R109X mutation show a mean haplotype length of 3.4 cM which was significantly longer than non-carriers ( $p < 10^{-14}$ ), suggesting a founder mutation.

Supplementary Figure 5: *ERCC3* mutations present in the cBioPortal (MSKCC) datasets. (A) Lollipop plot indicating positions of mutations within the ERCC3 protein. Colour of diagram circles indicates missense mutations (green), truncating mutations (red) and different mutation types (purple). The red arrow marks the R109X mutation. (B) Mutation frequencies of *ERCC3* across different cancer types. Filter was applied to display only cancer types that show 1% or higher mutation frequency.

Supplementary Figure 6: *ERCC3* transcript levels in patient derived whole blood. (A) Real time quantitative PCR of *ERCC3* transcript (spanning exons 9 & 10). The relative transcript levels are reduced in the mutation carrier derived cDNA relative to a non-carrier sibling. (B) Electropherogram of genomic DNA and cDNA showing the reduced peaks of the mutant allele.

Supplementary Table 1: Family history and pathology information on R109X carriers

Supplementary Table 2: Identity of mutations in HMLE cell lines generated by CRISPR/Cas9.

## Supplementary Figure 1

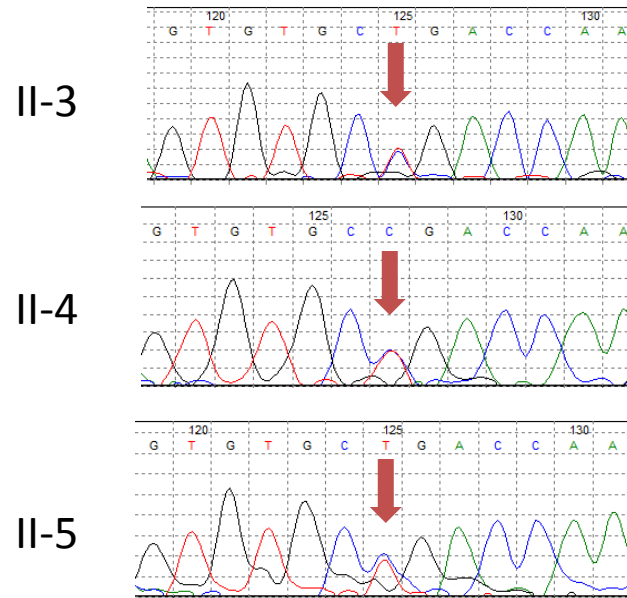

Supplementary Figure 2

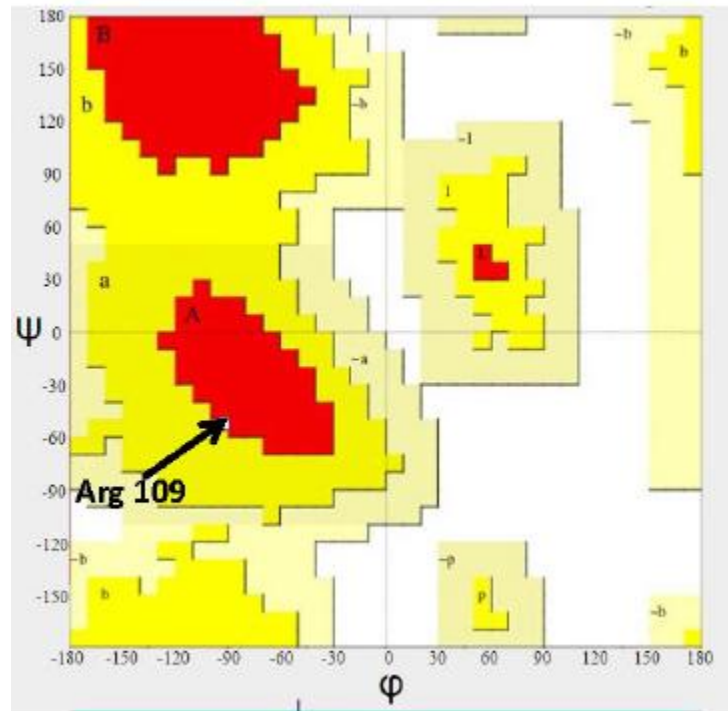

Supplementary Figure 3

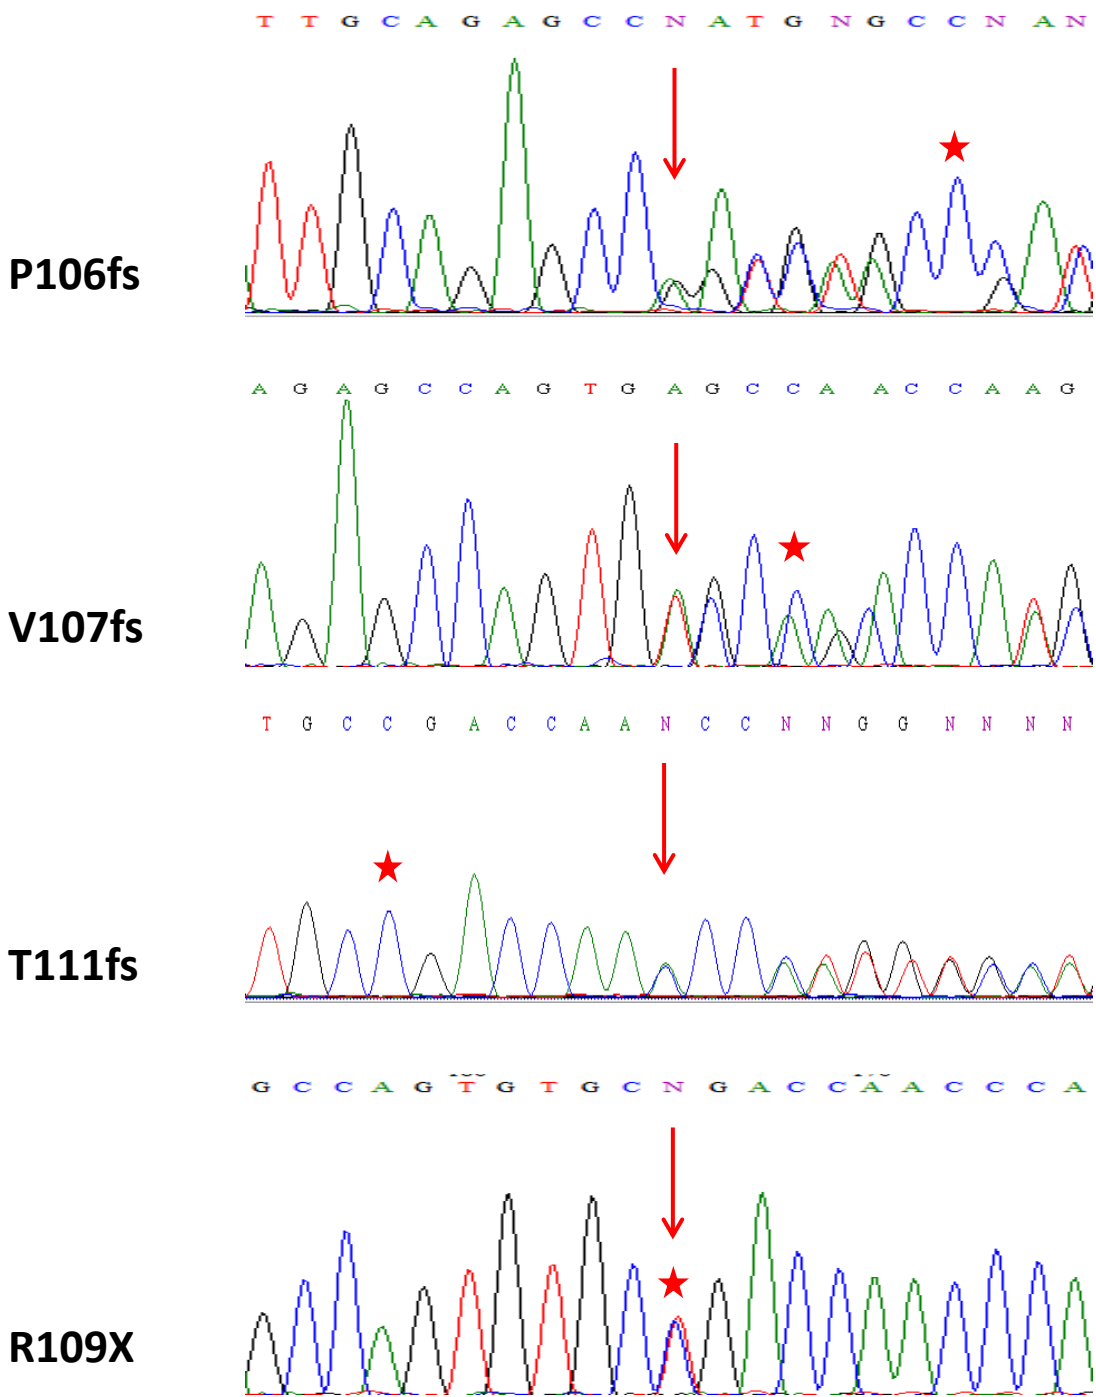

## Supplementary Figure 4

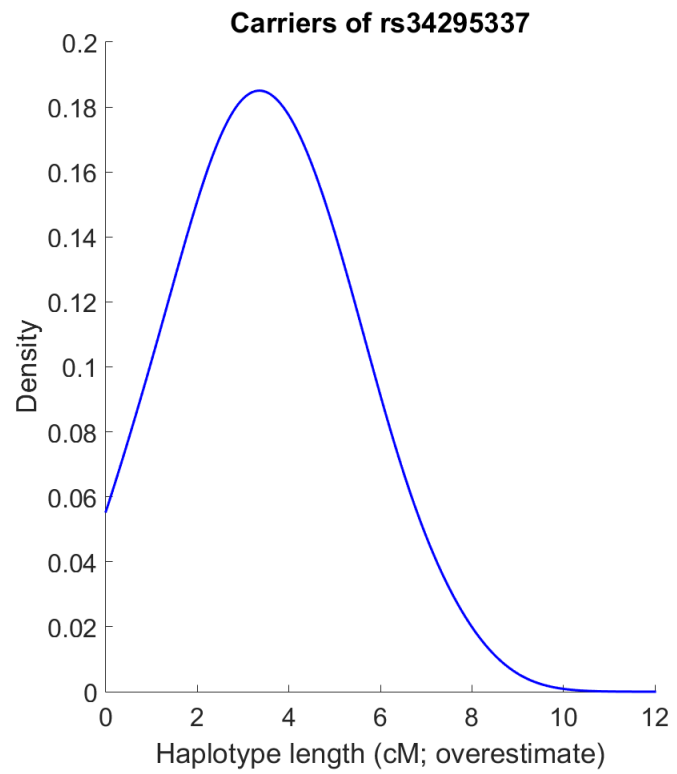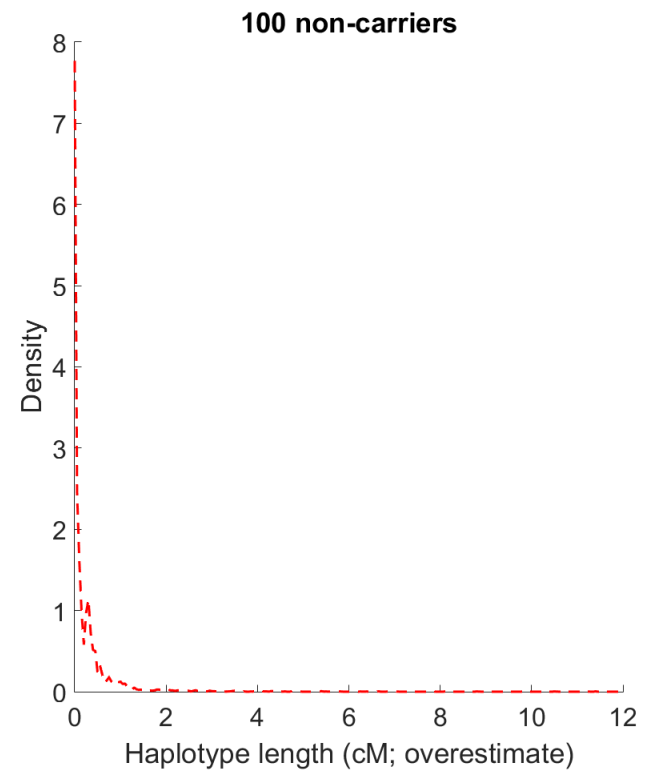

# Supplementary Figure 5A

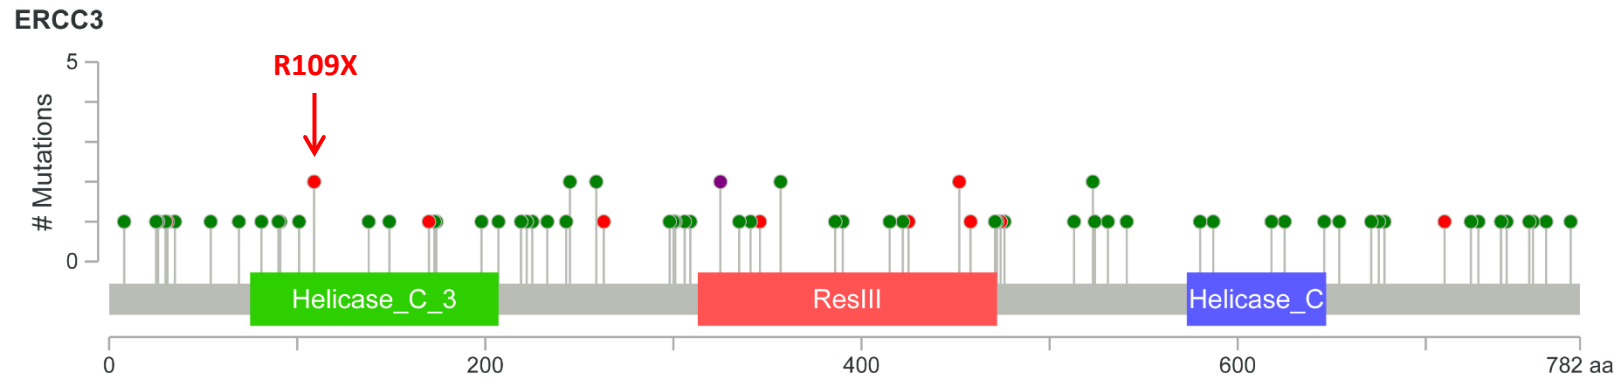

# Supplementary Figure 5B

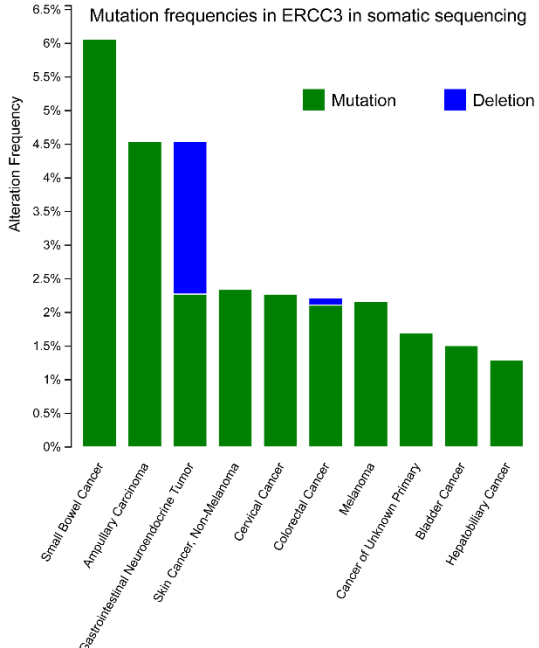

Supplementary Figure 6

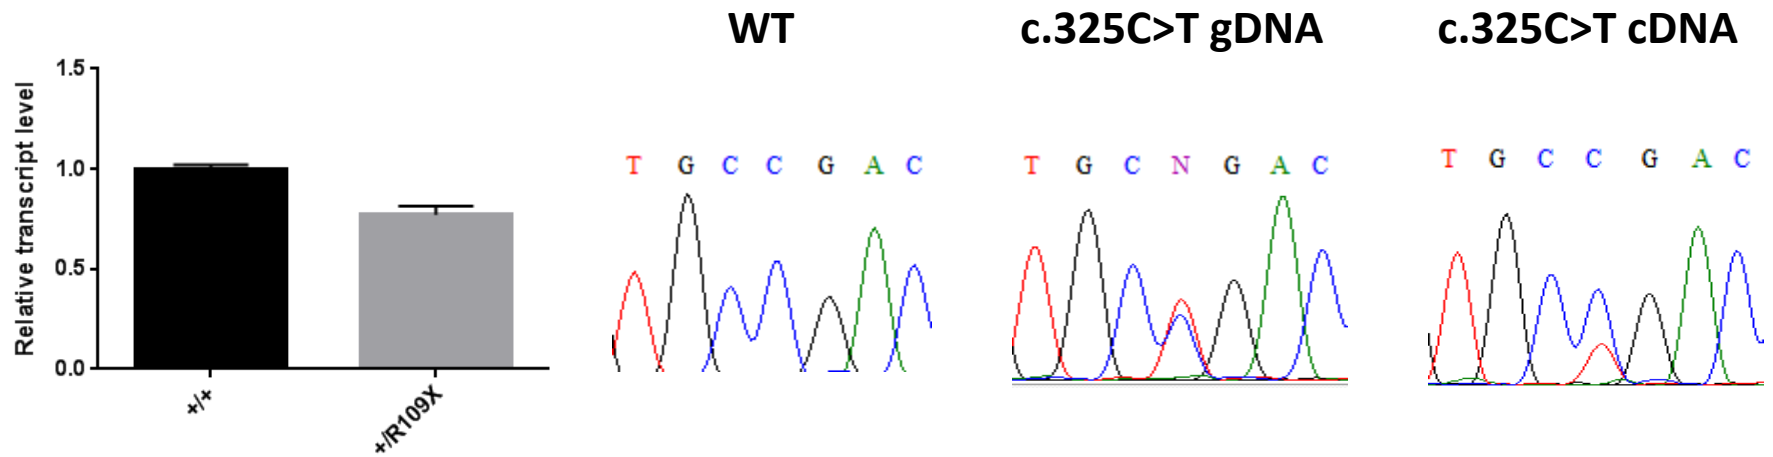



# Supplementary Table 1

| Family ID | Cancer Diagnosis   | Histology          | Age of Onset | Ancestry / Religion | Family History                                                                                                                                 | ER Status | PR Status | HER-2 Status | Gender  |
|-----------|--------------------|--------------------|--------------|---------------------|------------------------------------------------------------------------------------------------------------------------------------------------|-----------|-----------|--------------|---------|
| 48732     | Breast             | Lobular and Ductal | 52           | Ashkenazi Jewish    | Mother: Colorectal at 61; Maternal Aunt: Breast at 74                                                                                          | Positive  | Negative  | Negative     | Unknown |
| 48346     | Breast             | Lobular            | 64           | Ashkenazi Jewish    | Mother Melanoma at 53; Maternal Aunt: Colorectal at 70; Paternal Mother: Early-onset Breast                                                    | Positive  | Negative  | Negative     | Unknown |
| 47704     | Breast             | Ductal             | 54           | Ashkenazi Jewish    | Mother: Breast at 82; Maternal cousin: Breast at 52; Father: Colorectal at 80; Paternal Uncle: Lung at 50; Paternal Aunt: "Blood Cancer" at 71 | Positive  | Positive  | Negative     | Unknown |
| 47473     | Breast             | Ductal             | 52           | Ashkenazi Jewish    | Mother: Breast at 41, Colorectal and Melanoma age UNK; Maternal cousin: Breast at 30                                                           | Positive  | Negative  | Positive     | Unknown |
| 42836     | Breast             | Lobular and Ductal | 52           | Ashkenazi Jewish    | Mother: Breast at 68; Maternal Uncle: Prostate at 65                                                                                           | Unknown   | Unknown   | Unknown      | Unknown |
| 44371     | Breast             | Ductal             | 57           | Ashkenazi Jewish    | Mother: Breast at 45; Father: Pancreas at 85                                                                                                   | Positive  | Positive  | Negative     | Unknown |
| 44965     | Breast             | Ductal             | 72           | Ashkenazi Jewish    | Mother: Breast at 78; Sister: Stomach at 69; Maternal Aunt: Breast at 60                                                                       | Unknown   | Unknown   | Unknown      | Unknown |
| 44997     | Breast             | Ductal             | 70           | Ashkenazi Jewish    | Brother: Prostate at 70; Paternal Aunt: *CSU; Paternal Aunt: *CSU; Niece: Breast at 37; Niece: Lymphoma age UNK; Niece: *CSU                   | Positive  | Positive  | Positive     | Unknown |
| 44618     | Breast (Bilateral) | Ductal             | >80          | Ashkenazi Jewish    | Mother: Breast at 75, Bladder at 85; Brother: Lung at 83; Maternal Grandmother: *CSU at 76                                                     | Positive  | Positive  | Positive     | Unknown |
| 45678     | Breast, Colorectal | Lobular            | 60           | Ashkenazi Jewish    | Maternal Aunt: Colorectal; Niece: Breast <60                                                                                                   | Unknown   | Unknown   | Unknown      | Unknown |
| 45759     | Breast             | DCIS               | 59           | Ashkenazi Jewish    | Sister: Breast at 65; Sister: Lymphoma age UNK; Brother: Liver at 55                                                                           | Positive  | Positive  | Unknown      | Unknown |
| 57546     | Control            | N/A                | N/A          | Unknown             | Maternal Sister: Esophagus at 78                                                                                                               | N/A       | N/A       | N/A          | Unknown |
| 53103     | Control            | N/A                | N/A          | Muslim              | No significant family history                                                                                                                  | N/A       | N/A       | N/A          | Unknown |
| 53158     | Control            | N/A                | N/A          | Unknown             | Mother: Breast at 52, Eye at 31; Paternal Grandmother: Breast at 70; Paternal Aunt: Bone at 51                                                 | N/A       | N/A       | N/A          | Unknown |

\*"CSU": Cancer Site Unspecified

## Supplementary Table 2

| <b>Clone</b> | <b>Mutation type</b> | <b>Mutation position</b> | <b>AA change</b> | <b>Stop codon AA</b> |
|--------------|----------------------|--------------------------|------------------|----------------------|
| P106fs       | delTGCCG             | c.318                    | P106fs           | 112                  |
| V107fs       | delAGTGTGCC          | c.321                    | V107fs           | 113                  |
| T111fs       | insA                 | c.331                    | T111fs           | 115                  |
| R109X        | C>T                  | c.325                    | R109X            | 109                  |
